# Supplementary material
Source: ML conference proceedings conference paper supplement (https://openreview.net/forum?id=isATAFP71B)
Supplement: supplementary_material [file Appendix_Evolve_Agent_Nips.pdf › Appendix_Evolve_Agent_Nips.pdf]

### Reflection-Conclude Feature

You are an AI assistant specialized in analyzing code patches. I will provide a GitHub issue (problem\_statement) and a corresponding patch. Your task is to analyze this patch and provide detailed insights that could help develop an alternative solution.

Follow these steps:

1. Analyze the patch file and understand the changes made
2. Determine the core methods and techniques used to solve the problem
3. Identify the main files and sections that were modified
4. Identify key assumptions and limitations in the current solution

Return your analysis in JSON format with the following fields:

- approach\_summary: Summary of the main approach used in the first solution
- modified\_files: List of files that were modified
- key\_changes: Description of key code changes in the patch
- strategy: The core solution strategy at an abstract level
- specific\_technique\_from\_first\_solution: Specific technique used that should be avoided in alternative solutions
- specific\_files\_or\_functions: Files or functions that should not be modified in the same way
- assumptions\_made\_in\_first\_solution: Assumptions made in the first solution
- component\_not\_touched\_in\_first\_solution: Components or key functions not touched but potentially relevant
- different\_perspective: A different perspective for looking at the problem

The following examples are provided only for reference to illustrate the expected level of detail and abstraction for each field. Your analysis should be based on your own understanding of the patch and problem:

approach\_summary example: "Added a conditional check to handle MultiOutputClassifier by accessing classes through the estimators\_ attribute"

modified\_files example: ["sklearn/model\_selection/\_validation.py"]

key\_changes example: "Added a condition to check if estimator has 'estimators\_' attribute, then uses estimator.estimators\_[i\_label].classes\_ instead of estimator.classes\_[i\_label] for MultiOutputClassifier"

strategy example: "Component-specific exception handling" (instead of "Interface extension to provide unified attribute access")

specific\_technique\_from\_firs\_solution example: "Direct attribute checking with hasattr() and conditional branching"

specific\_files\_or\_functions example: "\_fit\_and\_predict function in sklearn/model\_selection/\_validation.py"

assumptions\_made\_in\_first\_solution example: "Assumes that only MultiOutputClassifier needs special handling for classes\_ attribute access"

component\_not\_touched\_in\_first\_solution example: "MultiOutputClassifier class in sklearn/multioutput.py which could implement classes\_ attribute directly"

different\_perspective example: "API consistency perspective: make MultiOutputClassifier conform to the same interface as other classifiers instead of modifying the validation module"

Problem: problem\_statement Trajectory: trajectory Patch: model\_patch

## Revision

Let's develop a different approach to fix it.

I've analyzed the first solution attempt, and here's what I found:

The first solution approached this problem by `approach_summary`. It modified `modified_files`, and the key changes involved `key_changes`.

The core strategy used was "strategy" which may have limitations. Specifically, the solution used `specific_technique` and focused on changing `specific_files`.

This approach makes some assumptions: assumptions

For our alternative solution, I want you to explore a completely different approach. Instead of following the same strategy, consider looking at this from a "different\_perspective" angle.

You might want to investigate `component_not_touched` as a potential area for your solution.

Remember, your goal is to create a patch that:

1. Solves the same problem but uses a fundamentally different approach
2. Avoids the techniques used in the first solution
3. Challenges the assumptions made in the first solution
4. Still aims to generate a patch that passes all tests, and use the 'submit' command when you believe your modifications are complete

Please analyze the problem again from this new perspective and develop your alternative solution.

478

**CrossOver**

You are an expert in analyzing and synthesizing agent trajectories. Your task is to critically analyze two different trajectories and create a new optimized trajectory by combining the best elements from both approaches.

Your fusion process should: 1. Identify the strengths and weaknesses of each trajectory 2. Extract the most effective strategies and techniques from both 3. Creatively integrate these elements into a coherent new trajectory 4. Ensure the new trajectory maintains logical flow and consistency 5. Avoid simply concatenating the trajectories - create genuine synthesis

You need to analyze both trajectories and provide: - Analysis of strengths from trajectory A - Analysis of strengths from trajectory B - A new fused trajectory that combines the best aspects - Rationale for the fusion decisions

Output must strictly follow JSON format, containing: - `trajectory_a_strengths`: list of strengths from first trajectory - `trajectory_b_strengths`: list of strengths from second trajectory - `fused_trajectory`: new trajectory steps combining best elements - `fusion_rationale`: explanation of fusion decisions

Trajectory A: `trajectory_a`

Trajectory B: `trajectory_b`

The following example demonstrates the expected output format and level of detail for trajectory fusion:

```
## Input Example Trajectory A: "trajectory": [ "step": 1, "action": "search_dir for
target function", "observation": "found function location quickly" , "step": 2, "action":
"directly edit function", "observation": "made changes without full analysis" , "step": 3,
"action": "submit solution", "observation": "task completed" ]
```

```
Trajectory B: "trajectory": [ "step": 1, "action": "analyze problem statement thoroughly",
"observation": "understood the root cause" , "step": 2, "action": "search_file to find
exact location", "observation": "took longer but found precise location" , "step": 3, "action":
"review existing code logic", "observation": "identified potential side effects" , "step": 4,
"action": "implement careful modification", "observation": "made robust changes" , "step":
5, "action": "test the solution", "observation": "verified correctness" , "step": 6, "action":
"submit solution", "observation": "task completed successfully" ]
```

```
## Output Example "trajectory_a_strengths": [ "Efficient search strategy using
search_dir", "Quick execution with minimal steps", "Direct approach to problem solving"
], "trajectory_b_strengths": [ "Thorough problem analysis at the beginning", "Careful
code review to identify potential issues", "Testing phase to ensure solution robustness",
"More comprehensive approach to code modification" ], "fused_trajectory": [ "step": 1,
"action": "analyze problem statement to understand root cause", "reasoning": "Combined
trajectory B's thorough analysis with trajectory A's efficiency goal" , "step": 2, "action":
"search_dir for target function with precise search terms", "reasoning": "Used trajectory
A's efficient search method with trajectory B's precision approach" , "step": 3, "action":
"review existing code logic and identify modifications needed", "reasoning": "Incorporated
trajectory B's careful review step before making changes" , "step": 4, "action": "implement
modification with consideration for edge cases", "reasoning": "Combined trajectory A's direct
editing with trajectory B's careful consideration" , "step": 5, "action": "submit solution after
quick validation", "reasoning": "Balanced trajectory A's efficiency with trajectory B's testing
approach" ], "fusion_rationale": "The fused trajectory combines trajectory A's efficiency
and direct approach with trajectory B's thoroughness and careful analysis. It maintains a
streamlined execution path while incorporating critical analysis and validation steps, resulting
in a solution that is both efficient and robust."
```

## Transfer

You are an expert in optimizing agent trajectories through transfer learning. Your task is to enhance a target trajectory by transferring effective strategies, insights, and approaches from a pool of reference trajectories.

Your transfer learning process should: 1. Analyze the target trajectory to identify areas for improvement 2. Extract valuable patterns, strategies and techniques from the reference trajectories 3. Transfer these elements to enhance the target trajectory 4. Ensure the enhanced trajectory maintains logical coherence and consistency 5. Focus on meaningful knowledge transfer, not simply adding steps

Target Trajectory: `trajectory_target`

Reference Trajectory Pool: `traj_pool`

Carefully analyze both the target trajectory and reference pool, then create an enhanced version of the target trajectory that incorporates the most valuable elements from the reference trajectories.

Your output should be a single JSON object representing the enhanced trajectory, following this exact format: `"trajectory": [ {"step": 1, "action": "action description", "observation": "observation description"}, {"step": 2, "action": "action description", "observation": "observation description"}, ... ]`

Make sure the enhanced trajectory: - Addresses weaknesses in the original target trajectory - Incorporates valuable insights from reference trajectories - Maintains a coherent problem-solving approach - Includes specific implementation details - Has logical progression between steps - Is complete enough to solve the task effectively

481

## Restructure

You are an expert in large-scale trajectory restructuring. Your task is to synthesize a new reasoning trajectory by analyzing the global structure of a trajectory population. Unlike Crossover or Transfer that focus on local segment manipulation, this task requires holistic restructuring based on global insights across all input trajectories.

Your restructuring process should: 1. Analyze the entire trajectory pool to discover abstract patterns, common subgoals, and shared structures 2. Identify redundant reasoning paths and filter out ineffective or repetitive steps 3. Synthesize a completely new trajectory that aligns with the overall problem-solving objective, but reflects a novel and optimized reasoning process 4. Maintain logical consistency, completeness, and step-wise progression of the trajectory

Trajectory Pool: trajectory\_pool

You must generate a single restructured trajectory that combines the collective strengths and high-level reasoning strategies inferred from the input trajectories. Your output should be a single JSON object representing the newly restructured trajectory, following this exact format:

```
{
  "new_trajectory": [
    {
      "step": 1,
      "action": "action description",
      "observation": "observation description",
      "reasoning": "why this step was chosen and how it contributes"
    },
    {
      "step": 2,
      "action": "action description",
      "observation": "observation description",
      "reasoning": "rationale for this step"
    }
    ...
  ]
}
```

Make sure the restructured trajectory: - Reflects global insights derived from the trajectory pool - Avoids redundancy and overly local reasoning - Introduces a coherent and efficient solution strategy - Demonstrates abstract synthesis and long-range planning - Forms a complete and executable path to solve the task

### 483 B.3 Refinement Operation

#### 484 B.3.1 Evaluate

##### Task Completion

You are an expert in large-scale trajectory restructuring. Your task is to synthesize a new reasoning trajectory by analyzing the global structure of a trajectory population. Unlike Crossover or Transfer that focus on local segment manipulation, this task requires holistic restructuring based on global insights across all input trajectories.

Your restructuring process should: 1. Analyze the entire trajectory pool to discover abstract patterns, common subgoals, and shared structures 2. Identify redundant reasoning paths and filter out ineffective or repetitive steps 3. Synthesize a completely new trajectory that aligns with the overall problem-solving objective, but reflects a novel and optimized reasoning process 4. Maintain logical consistency, completeness, and step-wise progression of the trajectory

Trajectory Pool: `trajectory_pool`

You must generate a single restructured trajectory that combines the collective strengths and high-level reasoning strategies inferred from the input trajectories. Your output should be a single JSON object representing the newly restructured trajectory, following this exact format:

```
{
  "new_trajectory": [
    {
      "step": 1,
      "action": "action description",
      "observation": "observation description",
      "reasoning": "why this step was chosen and how it contributes"
    },
    {
      "step": 2,
      "action": "action description",
      "observation": "observation description",
      "reasoning": "rationale for this step"
    }
    ...
  ]
}
```

Make sure the restructured trajectory: - Reflects global insights derived from the trajectory pool - Avoids redundancy and overly local reasoning - Introduces a coherent and efficient solution strategy - Demonstrates abstract synthesis and long-range planning - Forms a complete and executable path to solve the task

485
